# Supplementary material
Source: MDPI journal article supplement (https://www.mdpi.com/2304-6740/7/3/27)

# checkCIF/PLATON report

Structure factors have been supplied for datablock(s) SGGRB4

THIS REPORT IS FOR GUIDANCE ONLY. IF USED AS PART OF A REVIEW PROCEDURE FOR PUBLICATION, IT SHOULD NOT REPLACE THE EXPERTISE OF AN EXPERIENCED CRYSTALLOGRAPHIC REFEREE.

No syntax errors found.      CIF dictionary      Interpreting this report

## Datablock: SGGRB4

---

|                 |                                                     |                     |
|-----------------|-----------------------------------------------------|---------------------|
| Bond precision: | C-C = 0.0113 A                                      | Wavelength=0.71073  |
| Cell:           | a=11.6885(13)      b=16.2795(16)      c=15.0773(17) |                     |
|                 | alpha=90      beta=110.538(4)      gamma=90         |                     |
| Temperature:    | 150 K                                               |                     |
|                 | Calculated                                          | Reported            |
| Volume          | 2686.6(5)                                           | 2686.6(5)           |
| Space group     | P 21/n                                              | P 21/n              |
| Hall group      | -P 2yn                                              | -P 2yn              |
| Moiety formula  | C23 H38 B4 Fe O3 W2                                 | C23 H38 B4 Fe O3 W2 |
| Sum formula     | C23 H38 B4 Fe O3 W2                                 | C23 H38 B4 Fe O3 W2 |
| Mr              | 829.30                                              | 829.32              |
| Dx,g cm-3       | 2.050                                               | 2.050               |
| Z               | 4                                                   | 4                   |
| Mu (mm-1)       | 9.097                                               | 9.097               |
| F000            | 1576.0                                              | 1576.0              |
| F000'           | 1571.60                                             |                     |
| h,k,lmax        | 15,21,19                                            | 15,21,19            |
| Nref            | 6155                                                | 6147                |
| Tmin,Tmax       | 0.047,0.761                                         | 0.388,0.761         |
| Tmin'           | 0.004                                               |                     |

Correction method= # Reported T Limits: Tmin=0.388 Tmax=0.761  
AbsCorr = MULTI-SCAN

Data completeness= 0.999      Theta(max)= 27.484

R(reflections)= 0.0379( 5606)      wR2(reflections)= 0.1236( 6147)

S = 1.063      Npar= 320

---

The following ALERTS were generated. Each ALERT has the format  
**test-name\_ALERT\_alert-type\_alert-level.**  
Click on the hyperlinks for more details of the test.

---

### Alert level C

|                   |                                                  |         |      |
|-------------------|--------------------------------------------------|---------|------|
| PLAT250_ALERT_2_C | Large U3/U1 Ratio for Average U(i,j) Tensor .... | 2.1     | Note |
| PLAT342_ALERT_3_C | Low Bond Precision on C-C Bonds .....            | 0.01125 | Ang. |
| PLAT910_ALERT_3_C | Missing # of FCF Reflection(s) Below Theta(Min). | 8       | Note |
| PLAT971_ALERT_2_C | Check Calcd Resid. Dens. 1.05A From B43          | 2.33    | eA-3 |
| PLAT971_ALERT_2_C | Check Calcd Resid. Dens. 1.26A From W1           | 2.17    | eA-3 |
| PLAT971_ALERT_2_C | Check Calcd Resid. Dens. 1.17A From W1           | 2.14    | eA-3 |
| PLAT971_ALERT_2_C | Check Calcd Resid. Dens. 1.40A From W2           | 1.99    | eA-3 |
| PLAT971_ALERT_2_C | Check Calcd Resid. Dens. 1.00A From B44          | 1.92    | eA-3 |
| PLAT971_ALERT_2_C | Check Calcd Resid. Dens. 1.33A From W2           | 1.77    | eA-3 |
| PLAT971_ALERT_2_C | Check Calcd Resid. Dens. 1.28A From W2           | 1.70    | eA-3 |
| PLAT971_ALERT_2_C | Check Calcd Resid. Dens. 0.98A From B44          | 1.66    | eA-3 |
| PLAT971_ALERT_2_C | Check Calcd Resid. Dens. 1.18A From W2           | 1.60    | eA-3 |
| PLAT971_ALERT_2_C | Check Calcd Resid. Dens. 1.57A From B44          | 1.59    | eA-3 |
| PLAT971_ALERT_2_C | Check Calcd Resid. Dens. 1.19A From W2           | 1.58    | eA-3 |
| PLAT971_ALERT_2_C | Check Calcd Resid. Dens. 1.71A From W2           | 1.57    | eA-3 |
| PLAT972_ALERT_2_C | Check Calcd Resid. Dens. 0.81A From W2           | -2.13   | eA-3 |
| PLAT972_ALERT_2_C | Check Calcd Resid. Dens. 0.84A From W1           | -2.10   | eA-3 |
| PLAT972_ALERT_2_C | Check Calcd Resid. Dens. 1.00A From W1           | -2.07   | eA-3 |
| PLAT972_ALERT_2_C | Check Calcd Resid. Dens. 0.88A From W2           | -2.07   | eA-3 |
| PLAT972_ALERT_2_C | Check Calcd Resid. Dens. 0.62A From W2           | -2.00   | eA-3 |
| PLAT972_ALERT_2_C | Check Calcd Resid. Dens. 0.57A From W1           | -1.98   | eA-3 |
| PLAT972_ALERT_2_C | Check Calcd Resid. Dens. 0.54A From W2           | -1.87   | eA-3 |
| PLAT972_ALERT_2_C | Check Calcd Resid. Dens. 1.00A From W1           | -1.85   | eA-3 |
| PLAT972_ALERT_2_C | Check Calcd Resid. Dens. 1.09A From W2           | -1.83   | eA-3 |
| PLAT972_ALERT_2_C | Check Calcd Resid. Dens. 1.18A From B41          | -1.72   | eA-3 |
| PLAT972_ALERT_2_C | Check Calcd Resid. Dens. 0.82A From B43          | -1.68   | eA-3 |
| PLAT972_ALERT_2_C | Check Calcd Resid. Dens. 1.66A From W2           | -1.66   | eA-3 |
| PLAT972_ALERT_2_C | Check Calcd Resid. Dens. 0.96A From C11          | -1.63   | eA-3 |
| PLAT972_ALERT_2_C | Check Calcd Resid. Dens. 1.16A From W1           | -1.60   | eA-3 |
| PLAT972_ALERT_2_C | Check Calcd Resid. Dens. 1.08A From W2           | -1.57   | eA-3 |
| PLAT972_ALERT_2_C | Check Calcd Resid. Dens. 0.88A From C2           | -1.56   | eA-3 |
| PLAT972_ALERT_2_C | Check Calcd Resid. Dens. 1.72A From W1           | -1.51   | eA-3 |
| PLAT977_ALERT_2_C | Check Negative Difference Density on H10A        | -0.36   | eA-3 |
| PLAT977_ALERT_2_C | Check Negative Difference Density on H16C        | -0.33   | eA-3 |
| PLAT977_ALERT_2_C | Check Negative Difference Density on H19A        | -0.39   | eA-3 |
| PLAT977_ALERT_2_C | Check Negative Difference Density on H20B        | -0.52   | eA-3 |
| PLAT977_ALERT_2_C | Check Negative Difference Density on H41         | -0.38   | eA-3 |
| PLAT977_ALERT_2_C | Check Negative Difference Density on H42         | -0.49   | eA-3 |
| PLAT978_ALERT_2_C | Number C-C Bonds with Positive Residual Density. | 0       | Info |

---

### Alert level G

|                   |                                                  |       |       |
|-------------------|--------------------------------------------------|-------|-------|
| PLAT083_ALERT_2_G | SHELXL Second Parameter in WGHT Unusually Large  | 10.04 | Why ? |
| PLAT303_ALERT_2_G | Full Occupancy Atom H41B with # Connections      | 2.00  | Check |
| PLAT303_ALERT_2_G | Full Occupancy Atom H41C with # Connections      | 2.00  | Check |
| PLAT303_ALERT_2_G | Full Occupancy Atom H42B with # Connections      | 2.00  | Check |
| PLAT303_ALERT_2_G | Full Occupancy Atom H42C with # Connections      | 2.00  | Check |
| PLAT380_ALERT_4_G | Incorrectly? Oriented X(sp2)-Methyl Moiety ..... | C20   | Check |
| PLAT764_ALERT_4_G | Overcomplete CIF Bond List Detected (Rep/Expd) . | 1.11  | Ratio |
| PLAT779_ALERT_4_G | Suspect or Irrelevant (Bond) Angle in CIF .... # | 308   | Check |
|                   | W2 -B41 -H41B 1.555 1.555 1.555                  | 35.00 | Deg.  |
| PLAT779_ALERT_4_G | Suspect or Irrelevant (Bond) Angle in CIF .... # | 313   | Check |
|                   | W1 -B41 -H41C 1.555 1.555 1.555                  | 33.00 | Deg.  |
| PLAT913_ALERT_3_G | Missing # of Very Strong Reflections in FCF .... | 1     | Note  |

- 
- 0 **ALERT level A** = Most likely a serious problem - resolve or explain  
0 **ALERT level B** = A potentially serious problem, consider carefully  
39 **ALERT level C** = Check. Ensure it is not caused by an omission or oversight  
10 **ALERT level G** = General information/check it is not something unexpected

0 ALERT type 1 CIF construction/syntax error, inconsistent or missing data  
42 ALERT type 2 Indicator that the structure model may be wrong or deficient  
3 ALERT type 3 Indicator that the structure quality may be low  
4 ALERT type 4 Improvement, methodology, query or suggestion  
0 ALERT type 5 Informative message, check

---

It is advisable to attempt to resolve as many as possible of the alerts in all categories. Often the minor alerts point to easily fixed oversights, errors and omissions in your CIF or refinement strategy, so attention to these fine details can be worthwhile. In order to resolve some of the more serious problems it may be necessary to carry out additional measurements or structure refinements. However, the purpose of your study may justify the reported deviations and the more serious of these should normally be commented upon in the discussion or experimental section of a paper or in the "special\_details" fields of the CIF. checkCIF was carefully designed to identify outliers and unusual parameters, but every test has its limitations and alerts that are not important in a particular case may appear. Conversely, the absence of alerts does not guarantee there are no aspects of the results needing attention. It is up to the individual to critically assess their own results and, if necessary, seek expert advice.

### **Publication of your CIF in IUCr journals**

A basic structural check has been run on your CIF. These basic checks will be run on all CIFs submitted for publication in IUCr journals (*Acta Crystallographica*, *Journal of Applied Crystallography*, *Journal of Synchrotron Radiation*); however, if you intend to submit to *Acta Crystallographica Section C* or *E* or *IUCrData*, you should make sure that full publication checks are run on the final version of your CIF prior to submission.

### **Publication of your CIF in other journals**

Please refer to the *Notes for Authors* of the relevant journal for any special instructions relating to CIF submission.

---

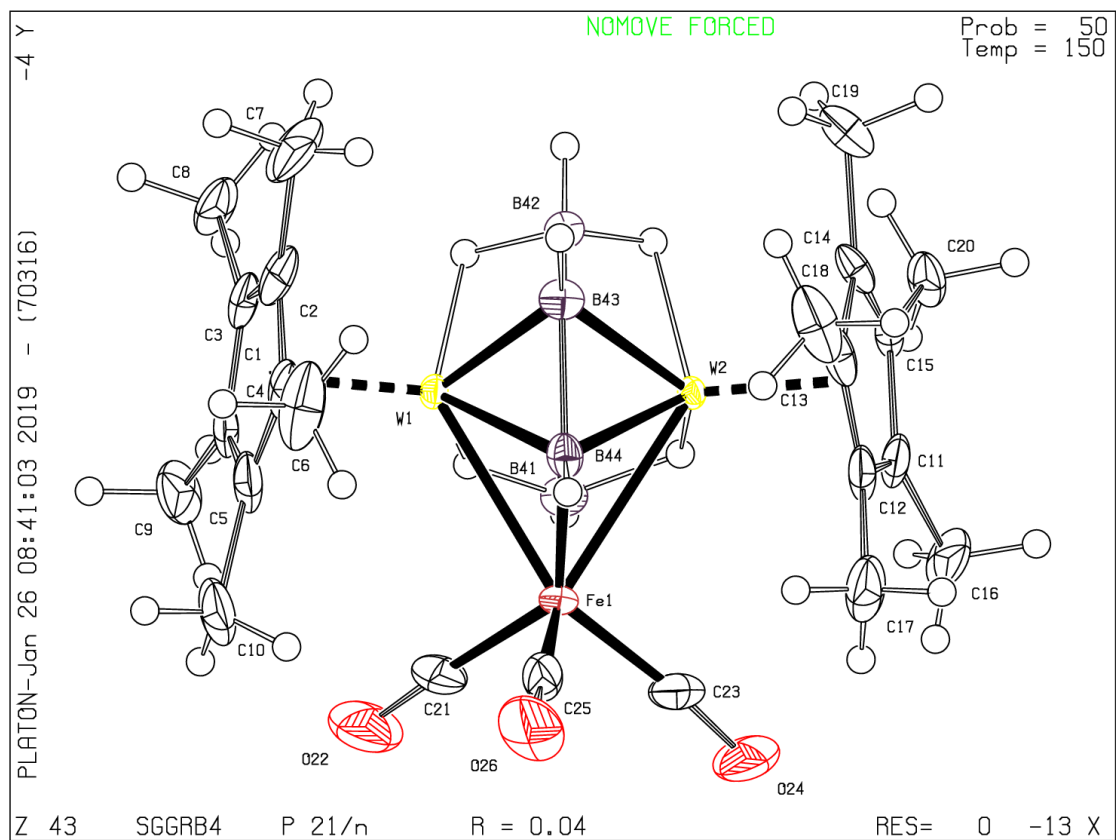

Supplement: s1 [file s1]
