# Supplementary material
Source: MDPI journal article supplement (https://www.mdpi.com/2304-6740/7/3/27)

# checkCIF/PLATON report

You have not supplied any structure factors. As a result the full set of tests cannot be run.

THIS REPORT IS FOR GUIDANCE ONLY. IF USED AS PART OF A REVIEW PROCEDURE FOR PUBLICATION, IT SHOULD NOT REPLACE THE EXPERTISE OF AN EXPERIENCED CRYSTALLOGRAPHIC REFEREE.

No syntax errors found.      CIF dictionary      Interpreting this report

## Datablock: SGGF3

---

Bond precision:    C-C = 0.0113 A                      Wavelength=0.71073

Cell:                a=16.3096(16)            b=18.8186(18)            c=19.9272(18)  
                      alpha=85.532(3)        beta=71.947(3)        gamma=89.111(3)

Temperature:    150 K

|                | Calculated          | Reported            |
|----------------|---------------------|---------------------|
| Volume         | 5797.1(10)          | 5797.1(10)          |
| Space group    | P -1                | P -1                |
| Hall group     | -P 1                | -P 1                |
| Moiety formula | C24 H30 B4 Mo O4 W2 | C24 H30 B4 Mo O4 W2 |
| Sum formula    | C24 H30 B4 Mo O4 W2 | C24 H30 B4 Mo O4 W2 |
| Mr             | 889.34              | 889.36              |
| Dx,g cm-3      | 2.038               | 2.038               |
| Z              | 8                   | 8                   |
| Mu (mm-1)      | 8.370               | 8.370               |
| F000           | 3328.0              | 3328.0              |
| F000'          | 3302.65             |                     |
| h,k,lmax       | 21,24,25            | 21,24,25            |
| Nref           | 26583               | 26525               |
| Tmin,Tmax      | 0.168,0.433         | 0.246,0.433         |
| Tmin'          | 0.127               |                     |

Correction method= # Reported T Limits: Tmin=0.246 Tmax=0.433  
AbsCorr = MULTI-SCAN

Data completeness= 0.998                      Theta(max)= 27.484

R(reflections)= 0.0349( 22650)            wR2(reflections)= 0.0880( 26525)

S = 1.065                      Npar= 1295

---

The following ALERTS were generated. Each ALERT has the format

**test-name\_ALERT\_alert-type\_alert-level.**

Click on the hyperlinks for more details of the test.

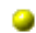

### Alert level C

|                                                                   |                             |       |        |
|-------------------------------------------------------------------|-----------------------------|-------|--------|
| PLAT213_ALERT_2_C Atom O22                                        | has ADP max/min Ratio ..... | 3.2   | prolat |
| PLAT213_ALERT_2_C Atom C16                                        | has ADP max/min Ratio ..... | 3.2   | prolat |
| PLAT213_ALERT_2_C Atom C17                                        | has ADP max/min Ratio ..... | 3.4   | prolat |
| PLAT213_ALERT_2_C Atom C18                                        | has ADP max/min Ratio ..... | 3.1   | prolat |
| PLAT213_ALERT_2_C Atom C22                                        | has ADP max/min Ratio ..... | 3.2   | prolat |
| PLAT213_ALERT_2_C Atom C38                                        | has ADP max/min Ratio ..... | 3.1   | prolat |
| PLAT213_ALERT_2_C Atom O82                                        | has ADP max/min Ratio ..... | 3.8   | prolat |
| PLAT213_ALERT_2_C Atom C70                                        | has ADP max/min Ratio ..... | 3.7   | prolat |
| PLAT213_ALERT_2_C Atom C99                                        | has ADP max/min Ratio ..... | 3.1   | prolat |
| PLAT213_ALERT_2_C Atom C100                                       | has ADP max/min Ratio ..... | 3.2   | prolat |
| PLAT220_ALERT_2_C Non-Solvent Resd 1 C                            | Ueq(max)/Ueq(min) Range     | 3.8   | Ratio  |
| PLAT220_ALERT_2_C Non-Solvent Resd 3 C                            | Ueq(max)/Ueq(min) Range     | 3.7   | Ratio  |
| PLAT220_ALERT_2_C Non-Solvent Resd 4 C                            | Ueq(max)/Ueq(min) Range     | 3.7   | Ratio  |
| PLAT241_ALERT_2_C High 'MainMol' Ueq as Compared to Neighbors of  | C22                         | Check |        |
| PLAT242_ALERT_2_C Low 'MainMol' Ueq as Compared to Neighbors of   | Mol                         | Check |        |
| PLAT342_ALERT_3_C Low Bond Precision on C-C Bonds .....           | 0.01131                     | Ang.  |        |
| PLAT790_ALERT_4_C Centre of Gravity not Within Unit Cell: Resd. # | 1                           | Note  |        |

C24 H30 B4 Mo O4 W2

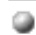

### Alert level G

|                                                                    |                     |
|--------------------------------------------------------------------|---------------------|
| PLAT005_ALERT_5_G No Embedded Refinement Details Found in the CIF  | Please Do !         |
| PLAT083_ALERT_2_G SHELXL Second Parameter in WGHT Unusually Large  | 63.69 Why ?         |
| PLAT154_ALERT_1_G The s.u.'s on the Cell Angles are Equal ..(Note) | 0.003 Degree        |
| PLAT232_ALERT_2_G Hirshfeld Test Diff (M-X) Mol --C23              | 5.7 s.u.            |
| PLAT343_ALERT_2_G Unusual sp? Angle Range in Main Residue for      | C24 Check           |
| PLAT343_ALERT_2_G Unusual sp? Angle Range in Main Residue for      | C54 Check           |
| PLAT343_ALERT_2_G Unusual sp? Angle Range in Main Residue for      | C84 Check           |
| PLAT343_ALERT_2_G Unusual sp? Angle Range in Main Residue for      | C111 Check          |
| PLAT380_ALERT_4_G Incorrectly? Oriented X(sp2)-Methyl Moiety ..... | C47 Check           |
| PLAT432_ALERT_2_G Short Inter X...Y Contact O82 ..C43              | 2.94 Ang.           |
|                                                                    | x,y,z = 1_555 Check |
| PLAT764_ALERT_4_G Overcomplete CIF Bond List Detected (Rep/Expd) . | 1.15 Ratio          |
| PLAT790_ALERT_4_G Centre of Gravity not Within Unit Cell: Resd. #  | 4 Note              |

C24 H30 B4 Mo O4 W2

- 
- 0 **ALERT level A** = Most likely a serious problem - resolve or explain  
0 **ALERT level B** = A potentially serious problem, consider carefully  
17 **ALERT level C** = Check. Ensure it is not caused by an omission or oversight  
12 **ALERT level G** = General information/check it is not something unexpected
- 1 **ALERT type 1** CIF construction/syntax error, inconsistent or missing data  
22 **ALERT type 2** Indicator that the structure model may be wrong or deficient  
1 **ALERT type 3** Indicator that the structure quality may be low  
4 **ALERT type 4** Improvement, methodology, query or suggestion  
1 **ALERT type 5** Informative message, check
-

It is advisable to attempt to resolve as many as possible of the alerts in all categories. Often the minor alerts point to easily fixed oversights, errors and omissions in your CIF or refinement strategy, so attention to these fine details can be worthwhile. In order to resolve some of the more serious problems it may be necessary to carry out additional measurements or structure refinements. However, the purpose of your study may justify the reported deviations and the more serious of these should normally be commented upon in the discussion or experimental section of a paper or in the "special\_details" fields of the CIF. checkCIF was carefully designed to identify outliers and unusual parameters, but every test has its limitations and alerts that are not important in a particular case may appear. Conversely, the absence of alerts does not guarantee there are no aspects of the results needing attention. It is up to the individual to critically assess their own results and, if necessary, seek expert advice.

### **Publication of your CIF in IUCr journals**

A basic structural check has been run on your CIF. These basic checks will be run on all CIFs submitted for publication in IUCr journals (*Acta Crystallographica*, *Journal of Applied Crystallography*, *Journal of Synchrotron Radiation*); however, if you intend to submit to *Acta Crystallographica Section C* or *E* or *IUCrData*, you should make sure that full publication checks are run on the final version of your CIF prior to submission.

### **Publication of your CIF in other journals**

Please refer to the *Notes for Authors* of the relevant journal for any special instructions relating to CIF submission.

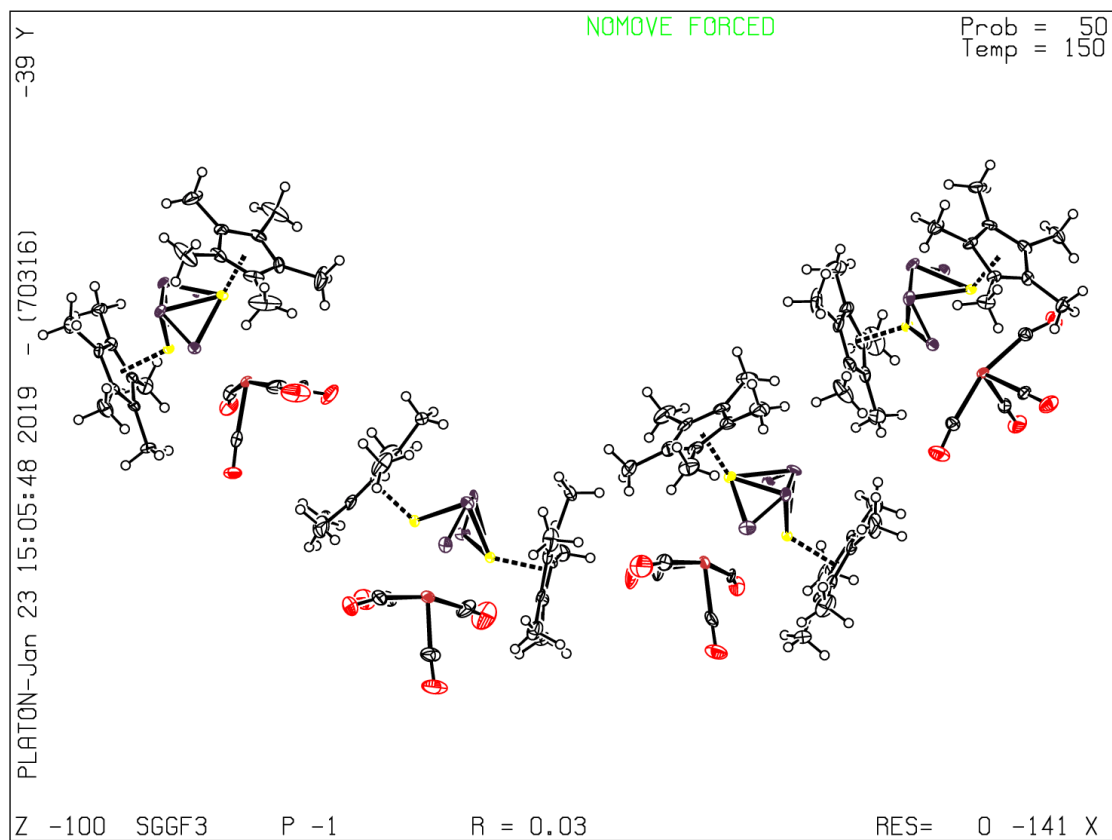

Supplement: s1 [file s1]
