# Supplementary material
Source: MDPI journal article supplement (https://www.mdpi.com/2304-6740/7/3/27)

# checkCIF/PLATON report

Structure factors have been supplied for datablock(s) wcrnew

THIS REPORT IS FOR GUIDANCE ONLY. IF USED AS PART OF A REVIEW PROCEDURE FOR PUBLICATION, IT SHOULD NOT REPLACE THE EXPERTISE OF AN EXPERIENCED CRYSTALLOGRAPHIC REFEREE.

No syntax errors found.      CIF dictionary      Interpreting this report

## Datablock: wcrnew

---

Bond precision:    C-C = 0.0607 Å                      Wavelength=0.71073

Cell:                      a=23.323(5)              b=14.555(3)              c=17.009(7)  
                                alpha=90              beta=90              gamma=90  
Temperature:              296 K

|                | Calculated          | Reported            |
|----------------|---------------------|---------------------|
| Volume         | 5774(3)             | 5774(3)             |
| Space group    | P c a 21            | P c a 21            |
| Hall group     | P 2c -2ac           | P 2c -2ac           |
| Moiety formula | C24 H30 B4 Cr O4 W2 | ?                   |
| Sum formula    | C24 H30 B4 Cr O4 W2 | C24 H37 B4 Cr O4 W2 |
| Mr             | 845.40              | 852.47              |
| Dx,g cm-3      | 1.945               | 1.961               |
| Z              | 8                   | 8                   |
| Mu (mm-1)      | 8.345               | 8.346               |
| F000           | 3184.0              | 3240.0              |
| F000'          | 3175.05             |                     |
| h,k,lmax       | 27,16,19            | 27,16,19            |
| Nref           | 9617[ 4994]         | 8977                |
| Tmin,Tmax      | 0.382,0.513         | 0.450,0.600         |
| Tmin'          | 0.253               |                     |

Correction method= # Reported T Limits: Tmin=0.450 Tmax=0.600  
AbsCorr = MULTI-SCAN

Data completeness= 1.80/0.93                      Theta(max)= 24.509

R(reflections)= 0.0879( 3645)              wR2(reflections)= 0.2215( 8977)

S = 0.997                      Npar= 650

---



The following ALERTS were generated. Each ALERT has the format  
**test-name\_ALERT\_alert-type\_alert-level.**  
Click on the hyperlinks for more details of the test.

---

### Alert level A

RINTA01\_ALERT\_3\_A The value of Rint is greater than 0.25  
Rint given 0.274

**Author Response: The crystal was poorly diffracting. This could have caused poor absorption profile. Also a small centrosymmetric twin componet (BASF 0.1)is present which makes the Rint further bad. Even after recrystallisation and fresh data collection the quality data did not much improve.**

PLAT020\_ALERT\_3\_A The Value of Rint is Greater Than 0.12 ..... 0.274 Report

**Author Response: The crystal was poorly diffracting. This could have caused poor absorption profile. Also a small centrosymmetric twin componet (BASF 0.1)is present which makes the Rint further bad. Even after recrystallisation and fresh data collection the quality data did not much improve.**

---

### Alert level B

PLAT342\_ALERT\_3\_B Low Bond Precision on C-C Bonds ..... 0.06075 Ang.  
PLAT973\_ALERT\_2\_B Check Calcd Positive Resid. Density on W2 1.52 eA-3

---

### Alert level C

THETM01\_ALERT\_3\_C The value of sine(theta\_max)/wavelength is less than 0.590  
Calculated sin(theta\_max)/wavelength = 0.5837

|                   |                                                  |              |
|-------------------|--------------------------------------------------|--------------|
| PLAT026_ALERT_3_C | Ratio Observed / Unique Reflections (too) Low .. | 41% Check    |
| PLAT041_ALERT_1_C | Calc. and Reported SumFormula Strings Differ     | Please Check |
| PLAT043_ALERT_1_C | Calculated and Reported Mol. Weight Differ by .. | 7.07 Check   |
| PLAT068_ALERT_1_C | Reported F000 Differs from Calcd (or Missing)... | Please Check |
| PLAT090_ALERT_3_C | Poor Data / Parameter Ratio (Zmax > 18) .....    | 7.59 Note    |
| PLAT147_ALERT_1_C | s.u. on Symmetry Constrained Cell Angle(s) ..... | Please Check |
| PLAT213_ALERT_2_C | Atom C38 has ADP max/min Ratio .....             | 3.3 oblate   |
| PLAT241_ALERT_2_C | High 'MainMol' Ueq as Compared to Neighbors of   | C41 Check    |
| PLAT242_ALERT_2_C | Low 'MainMol' Ueq as Compared to Neighbors of    | Cr1 Check    |
| PLAT242_ALERT_2_C | Low 'MainMol' Ueq as Compared to Neighbors of    | C1 Check     |
| PLAT242_ALERT_2_C | Low 'MainMol' Ueq as Compared to Neighbors of    | C43 Check    |
| PLAT242_ALERT_2_C | Low 'MainMol' Ueq as Compared to Neighbors of    | W3 Check     |
| PLAT242_ALERT_2_C | Low 'MainMol' Ueq as Compared to Neighbors of    | W4 Check     |
| PLAT242_ALERT_2_C | Low 'MainMol' Ueq as Compared to Neighbors of    | Cr2 Check    |
| PLAT242_ALERT_2_C | Low 'MainMol' Ueq as Compared to Neighbors of    | C22 Check    |
| PLAT242_ALERT_2_C | Low 'MainMol' Ueq as Compared to Neighbors of    | C45 Check    |
| PLAT260_ALERT_2_C | Large Average Ueq of Residue Including W3        | 0.084 Check  |
| PLAT723_ALERT_1_C | Torsion Calc -37.00, Rep -34(34) Dev...          | 3.00 Sigma   |
|                   | 01 -C41 -CR1 -C43 1.555 1.555 1.555 1.555 # 188  | Check        |
| PLAT723_ALERT_1_C | Torsion Calc 56.00, Rep 59(34) Dev...            | 3.00 Sigma   |
|                   | 01 -C41 -CR1 -C42 1.555 1.555 1.555 1.555 # 189  | Check        |
| PLAT723_ALERT_1_C | Torsion Calc -3.00, Rep 0(43) Dev...             | 3.00 Sigma   |
|                   | 01 -C41 -CR1 -C44 1.555 1.555 1.555 1.555 # 190  | Check        |
| PLAT723_ALERT_1_C | Torsion Calc 158.00, Rep 160(33) Dev...          | 2.00 Sigma   |
|                   | 01 -C41 -CR1 -B1 1.555 1.555 1.555 1.555 # 191   | Check        |
| PLAT723_ALERT_1_C | Torsion Calc -154.00, Rep -151(34) Dev...        | 3.00 Sigma   |



|                                                                    |          |         |           |        |   |       |                |
|--------------------------------------------------------------------|----------|---------|-----------|--------|---|-------|----------------|
| O1 -C41 -CR1 -W1                                                   | 1.555    | 1.555   | 1.555     | 1.555  | # | 192   | Check          |
| PLAT723_ALERT_1_C Torsion Calc                                     | 161.00,  | Rep     | 163(35)   | Dev... |   | 2.00  | Sigma          |
| O1 -C41 -CR1 -W2                                                   | 1.555    | 1.555   | 1.555     | 1.555  | # | 193   | Check          |
| PLAT733_ALERT_1_C Torsion Calc                                     | -1(6),   | Rep     | 0.1(10)   | .....  |   | 6.00  | s.u.-R         |
| C8 -C3 -C4 -C9                                                     | 1.555    | 1.555   | 1.555     | 1.555  | # | 20    | Check          |
| PLAT733_ALERT_1_C Torsion Calc                                     | 113(5),  | Rep     | 113.1(11) | .....  |   | 4.55  | s.u.-R         |
| W2 -C11 -C12 -C17                                                  | 1.555    | 1.555   | 1.555     | 1.555  | # | 44    | Check          |
| PLAT733_ALERT_1_C Torsion Calc                                     | -179(4), | Rep     | -179.9(7) | .....  |   | 5.71  | s.u.-R         |
| C22 -C23 -C24 -C29                                                 | 1.555    | 1.555   | 1.555     | 1.555  | # | 94    | Check          |
| PLAT733_ALERT_1_C Torsion Calc                                     | -1(4),   | Rep     | 0.0(7)    | .....  |   | 5.71  | s.u.-R         |
| C22 -C21 -C25 -C24                                                 | 1.555    | 1.555   | 1.555     | 1.555  | # | 106   | Check          |
| PLAT733_ALERT_1_C Torsion Calc                                     | 1(4),    | Rep     | 0.1(8)    | .....  |   | 5.00  | s.u.-R         |
| C33 -C34 -C35 -C31                                                 | 1.555    | 1.555   | 1.555     | 1.555  | # | 136   | Check          |
| PLAT733_ALERT_1_C Torsion Calc                                     | -1(4),   | Rep     | 0.0(7)    | .....  |   | 5.71  | s.u.-R         |
| C32 -C31 -C35 -C34                                                 | 1.555    | 1.555   | 1.555     | 1.555  | # | 144   | Check          |
| PLAT733_ALERT_1_C Torsion Calc                                     | 1(6),    | Rep     | -0.2(10)  | .....  |   | 6.00  | s.u.-R         |
| C36 -C31 -C35 -C40                                                 | 1.555    | 1.555   | 1.555     | 1.555  | # | 148   | Check          |
| PLAT753_ALERT_4_C Torsion Calc                                     | -37.00,  | Rep     | -34(34)   | .....  |   |       | Senseless s.u. |
| O1 -C41 -CR1 -C43                                                  | 1.555    | 1.555   | 1.555     | 1.555  | # | 188   | Check          |
| PLAT753_ALERT_4_C Torsion Calc                                     | 56.00,   | Rep     | 59(34)    | .....  |   |       | Senseless s.u. |
| O1 -C41 -CR1 -C42                                                  | 1.555    | 1.555   | 1.555     | 1.555  | # | 189   | Check          |
| PLAT753_ALERT_4_C Torsion Calc                                     | -3.00,   | Rep     | 0(43)     | .....  |   |       | Senseless s.u. |
| O1 -C41 -CR1 -C44                                                  | 1.555    | 1.555   | 1.555     | 1.555  | # | 190   | Check          |
| PLAT753_ALERT_4_C Torsion Calc                                     | 158.00,  | Rep     | 160(33)   | .....  |   |       | Senseless s.u. |
| O1 -C41 -CR1 -B1                                                   | 1.555    | 1.555   | 1.555     | 1.555  | # | 191   | Check          |
| PLAT753_ALERT_4_C Torsion Calc                                     | -154.00, | Rep     | -151(34)  | .....  |   |       | Senseless s.u. |
| O1 -C41 -CR1 -W1                                                   | 1.555    | 1.555   | 1.555     | 1.555  | # | 192   | Check          |
| PLAT753_ALERT_4_C Torsion Calc                                     | 161.00,  | Rep     | 163(35)   | .....  |   |       | Senseless s.u. |
| O1 -C41 -CR1 -W2                                                   | 1.555    | 1.555   | 1.555     | 1.555  | # | 193   | Check          |
| PLAT753_ALERT_4_C Torsion Calc                                     | -48.00,  | Rep     | -49(26)   | .....  |   |       | Senseless s.u. |
| O5 -C45 -CR2 -C48                                                  | 1.555    | 1.555   | 1.555     | 1.555  | # | 202   | Check          |
| PLAT911_ALERT_3_C Missing FCF Refl Between Thmin & STh/L=          |          |         | 0.584     |        |   | 61    | Report         |
| PLAT915_ALERT_3_C No Flack x Check Done: Low Friedel Pair Coverage |          |         |           |        |   | 87    | %              |
| PLAT971_ALERT_2_C Check Calcd Resid. Dens.                         | 0.27A    | From W4 |           |        |   | 1.77  | eA-3           |
| PLAT971_ALERT_2_C Check Calcd Resid. Dens.                         | 0.24A    | From W3 |           |        |   | 1.65  | eA-3           |
| PLAT973_ALERT_2_C Check Calcd Positive Resid. Density on           |          | W1      |           |        |   | 1.46  | eA-3           |
| PLAT976_ALERT_2_C Check Calcd Resid. Dens.                         | 0.92A    | From O8 |           |        |   | -0.66 | eA-3           |
| PLAT977_ALERT_2_C Check Negative Difference Density on H29B        |          |         |           |        |   | -0.40 | eA-3           |
| PLAT977_ALERT_2_C Check Negative Difference Density on H36A        |          |         |           |        |   | -0.33 | eA-3           |
| PLAT977_ALERT_2_C Check Negative Difference Density on H40B        |          |         |           |        |   | -0.41 | eA-3           |
| PLAT978_ALERT_2_C Number C-C Bonds with Positive Residual Density. |          |         |           |        |   | 0     | Info           |

## Alert level G

FORMU01\_ALERT\_2\_G There is a discrepancy between the atom counts in the  
 \_chemical\_formula\_sum and the formula from the \_atom\_site\* data.  
 Atom count from \_chemical\_formula\_sum: C24 H37 B4 Cr1 O4 W2  
 Atom count from the \_atom\_site data: C24 H30 B4 Cr1 O4 W2

CELLZ01\_ALERT\_1\_G Difference between formula and atom\_site contents detected.

CELLZ01\_ALERT\_1\_G WARNING: H atoms missing from atom site list. Is this intentional?

From the CIF: \_cell\_formula\_units\_Z 8  
 From the CIF: \_chemical\_formula\_sum C24 H37 B4 Cr O4 W2  
 TEST: Compare cell contents of formula and atom\_site data

| atom | Z*formula | cif sites | diff  |
|------|-----------|-----------|-------|
| C    | 192.00    | 192.00    | 0.00  |
| H    | 296.00    | 240.00    | 56.00 |
| B    | 32.00     | 32.00     | 0.00  |
| Cr   | 8.00      | 8.00      | 0.00  |
| O    | 32.00     | 32.00     | 0.00  |
| W    | 16.00     | 16.00     | 0.00  |



|                   |                                                  |       |        |
|-------------------|--------------------------------------------------|-------|--------|
| PLAT002_ALERT_2_G | Number of Distance or Angle Restraints on AtSite | 58    | Note   |
| PLAT003_ALERT_2_G | Number of Uiso or Uij Restrained non-H Atoms ... | 64    | Report |
| PLAT172_ALERT_4_G | The CIF-Embedded .res File Contains DFIX Records | 5     | Report |
| PLAT174_ALERT_4_G | The CIF-Embedded .res File Contains FLAT Records | 4     | Report |
| PLAT176_ALERT_4_G | The CIF-Embedded .res File Contains SADI Records | 6     | Report |
| PLAT178_ALERT_4_G | The CIF-Embedded .res File Contains SIMU Records | 10    | Report |
| PLAT186_ALERT_4_G | The CIF-Embedded .res File Contains ISOR Records | 2     | Report |
| PLAT187_ALERT_4_G | The CIF-Embedded .res File Contains RIGU Records | 5     | Report |
| PLAT343_ALERT_2_G | Unusual sp? Angle Range in Main Residue for      | C45   | Check  |
| PLAT343_ALERT_2_G | Unusual sp? Angle Range in Main Residue for      | C48   | Check  |
| PLAT380_ALERT_4_G | Incorrectly? Oriented X(sp2)-Methyl Moiety ..... | C16   | Check  |
| PLAT380_ALERT_4_G | Incorrectly? Oriented X(sp2)-Methyl Moiety ..... | C19   | Check  |
| PLAT380_ALERT_4_G | Incorrectly? Oriented X(sp2)-Methyl Moiety ..... | C40   | Check  |
| PLAT721_ALERT_1_G | Bond Calc 0.97000, Rep 0.96000 Dev...            | 0.01  | Ang.   |
|                   | C6 -H6B 1.555 1.555 .....                        | # 17  | Check  |
| PLAT721_ALERT_1_G | Bond Calc 0.97000, Rep 0.96000 Dev...            | 0.01  | Ang.   |
|                   | C8 -H8C 1.555 1.555 .....                        | # 24  | Check  |
| PLAT721_ALERT_1_G | Bond Calc 0.97000, Rep 0.96000 Dev...            | 0.01  | Ang.   |
|                   | C9 -H9A 1.555 1.555 .....                        | # 25  | Check  |
| PLAT721_ALERT_1_G | Bond Calc 0.97000, Rep 0.96000 Dev...            | 0.01  | Ang.   |
|                   | C10 -H10B 1.555 1.555 .....                      | # 29  | Check  |
| PLAT721_ALERT_1_G | Bond Calc 0.97000, Rep 0.96000 Dev...            | 0.01  | Ang.   |
|                   | C16 -H16A 1.555 1.555 .....                      | # 46  | Check  |
| PLAT721_ALERT_1_G | Bond Calc 0.97000, Rep 0.96000 Dev...            | 0.01  | Ang.   |
|                   | C17 -H17C 1.555 1.555 .....                      | # 51  | Check  |
| PLAT721_ALERT_1_G | Bond Calc 0.97000, Rep 0.96000 Dev...            | 0.01  | Ang.   |
|                   | C20 -H20C 1.555 1.555 .....                      | # 60  | Check  |
| PLAT721_ALERT_1_G | Bond Calc 0.97000, Rep 0.96000 Dev...            | 0.01  | Ang.   |
|                   | C28 -H28B 1.555 1.555 .....                      | # 83  | Check  |
| PLAT721_ALERT_1_G | Bond Calc 0.97000, Rep 0.96000 Dev...            | 0.01  | Ang.   |
|                   | C29 -H29A 1.555 1.555 .....                      | # 85  | Check  |
| PLAT721_ALERT_1_G | Bond Calc 0.97000, Rep 0.96000 Dev...            | 0.01  | Ang.   |
|                   | C30 -H30A 1.555 1.555 .....                      | # 88  | Check  |
| PLAT721_ALERT_1_G | Bond Calc 0.97000, Rep 0.96000 Dev...            | 0.01  | Ang.   |
|                   | C36 -H36B 1.555 1.555 .....                      | # 107 | Check  |
| PLAT721_ALERT_1_G | Bond Calc 0.97000, Rep 0.96000 Dev...            | 0.01  | Ang.   |
|                   | C37 -H37B 1.555 1.555 .....                      | # 110 | Check  |
| PLAT721_ALERT_1_G | Bond Calc 0.97000, Rep 0.96000 Dev...            | 0.01  | Ang.   |
|                   | C39 -H39A 1.555 1.555 .....                      | # 115 | Check  |
| PLAT721_ALERT_1_G | Bond Calc 0.97000, Rep 0.96000 Dev...            | 0.01  | Ang.   |
|                   | C40 -H40C 1.555 1.555 .....                      | # 120 | Check  |
| PLAT722_ALERT_1_G | Angle Calc 108.00, Rep 109.50 Dev...             | 1.50  | Degree |
|                   | H9A -C9 -H9B 1.555 1.555 1.555                   | # 51  | Check  |
| PLAT722_ALERT_1_G | Angle Calc 111.00, Rep 109.50 Dev...             | 1.50  | Degree |
|                   | C4 -C9 -H9C 1.555 1.555 1.555                    | # 52  | Check  |
| PLAT722_ALERT_1_G | Angle Calc 108.00, Rep 109.50 Dev...             | 1.50  | Degree |
|                   | H20B -C20 -H20C 1.555 1.555 1.555                | # 120 | Check  |
| PLAT722_ALERT_1_G | Angle Calc 108.00, Rep 109.50 Dev...             | 1.50  | Degree |
|                   | H30A -C30 -H30B 1.555 1.555 1.555                | # 177 | Check  |
| PLAT764_ALERT_4_G | Overcomplete CIF Bond List Detected (Rep/Expd) . | 1.20  | Ratio  |
| PLAT860_ALERT_3_G | Number of Least-Squares Restraints .....         | 666   | Note   |

---

2 **ALERT level A** = Most likely a serious problem - resolve or explain  
 2 **ALERT level B** = A potentially serious problem, consider carefully  
 48 **ALERT level C** = Check. Ensure it is not caused by an omission or oversight  
 36 **ALERT level G** = General information/check it is not something unexpected  
  
 37 **ALERT type 1** CIF construction/syntax error, inconsistent or missing data



25 ALERT type 2 Indicator that the structure model may be wrong or deficient  
9 ALERT type 3 Indicator that the structure quality may be low  
17 ALERT type 4 Improvement, methodology, query or suggestion  
0 ALERT type 5 Informative message, check

---

It is advisable to attempt to resolve as many as possible of the alerts in all categories. Often the minor alerts point to easily fixed oversights, errors and omissions in your CIF or refinement strategy, so attention to these fine details can be worthwhile. In order to resolve some of the more serious problems it may be necessary to carry out additional measurements or structure refinements. However, the purpose of your study may justify the reported deviations and the more serious of these should normally be commented upon in the discussion or experimental section of a paper or in the "special\_details" fields of the CIF. checkCIF was carefully designed to identify outliers and unusual parameters, but every test has its limitations and alerts that are not important in a particular case may appear. Conversely, the absence of alerts does not guarantee there are no aspects of the results needing attention. It is up to the individual to critically assess their own results and, if necessary, seek expert advice.

### **Publication of your CIF in IUCr journals**

A basic structural check has been run on your CIF. These basic checks will be run on all CIFs submitted for publication in IUCr journals (*Acta Crystallographica*, *Journal of Applied Crystallography*, *Journal of Synchrotron Radiation*); however, if you intend to submit to *Acta Crystallographica Section C* or *E* or *IUCrData*, you should make sure that full publication checks are run on the final version of your CIF prior to submission.

### **Publication of your CIF in other journals**

Please refer to the *Notes for Authors* of the relevant journal for any special instructions relating to CIF submission.

---



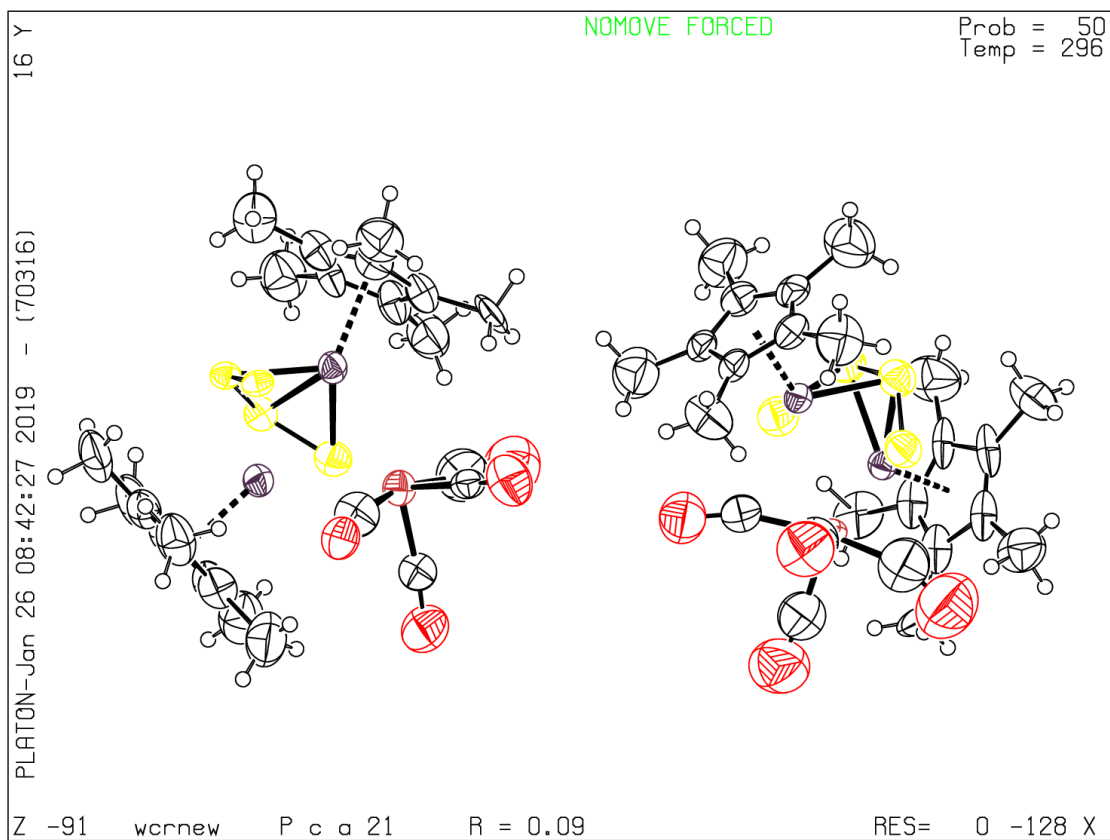

Supplement: s1 [file s1]
