# Supplementary material
Source: MDPI journal article supplement (https://www.mdpi.com/2304-6740/7/3/27)
Supplement: s1 [file s1]

# **Supplementary Materials: Synthesis, Structures and Chemistry of the Metallaboranes of Group 4–9 with $M_2B_5$ Core Having a Cross Cluster M–M Bond**

**Ranjit Bag, Suvam Saha, Rosmita Borthakur, Bijan Mondal, Thierry Roisnel, Vincent Dorcet, Jean-François Halet and Sundargopal Ghosh**

## Table of Contents

### Supplementary figures

|                    |                                                                                      |
|--------------------|--------------------------------------------------------------------------------------|
| <b>Figure S1.</b>  | $^1\text{H}$ NMR spectrum of compound <b>1</b> in $\text{CDCl}_3$ .                  |
| <b>Figure S2.</b>  | $^{11}\text{B}\{^1\text{H}\}$ NMR spectrum of compound <b>1</b> in $\text{CDCl}_3$ . |
| <b>Figure S3.</b>  | IR spectrum of compound <b>1</b> .                                                   |
| <b>Figure S4.</b>  | $^1\text{H}$ NMR spectrum of compound <b>2</b> in $\text{CDCl}_3$ .                  |
| <b>Figure S5.</b>  | $^{11}\text{B}\{^1\text{H}\}$ NMR spectrum of compound <b>2</b> in $\text{CDCl}_3$ . |
| <b>Figure S6.</b>  | IR spectrum of compound <b>2</b> .                                                   |
| <b>Figure S7.</b>  | HR-MS spectrum of compound <b>2</b> .                                                |
| <b>Figure S8.</b>  | $^1\text{H}$ NMR spectrum of compound <b>3</b> in $\text{CDCl}_3$ .                  |
| <b>Figure S9.</b>  | $^{11}\text{B}\{^1\text{H}\}$ NMR spectrum of compound <b>3</b> in $\text{CDCl}_3$ . |
| <b>Figure S10.</b> | IR spectrum of compound <b>3</b> .                                                   |
| <b>Figure S11.</b> | HR-MS spectrum of compound <b>3</b> .                                                |
| <b>Figure S12.</b> | $^1\text{H}$ NMR spectrum of compound <b>4</b> in $\text{CDCl}_3$ .                  |
| <b>Figure S13.</b> | $^{11}\text{B}\{^1\text{H}\}$ NMR spectrum of compound <b>4</b> in $\text{CDCl}_3$ . |
| <b>Figure S14.</b> | IR spectrum of compound <b>4</b> .                                                   |
| <b>Figure S15.</b> | HR-MS spectrum of compound <b>4</b> .                                                |
| <b>Figure S16.</b> | $^1\text{H}$ NMR spectrum of compound <b>5</b> in $\text{CDCl}_3$ .                  |
| <b>Figure S17.</b> | $^{11}\text{B}\{^1\text{H}\}$ NMR spectrum of compound <b>5</b> in $\text{CDCl}_3$ . |
| <b>Figure S18.</b> | IR spectrum of compound <b>5</b> .                                                   |
| <b>Figure S19.</b> | HR-MS spectrum of compound <b>5</b> .                                                |

## Supplementary figures

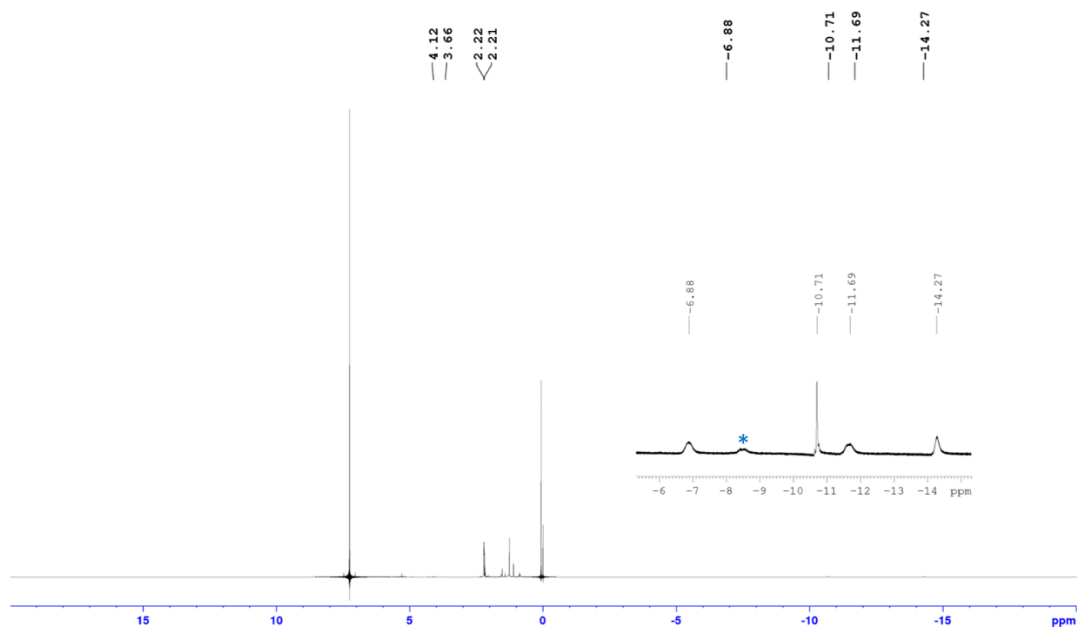

**Figure S1.**  $^1\text{H}$  NMR spectrum of compound **1** in  $\text{CDCl}_3$ . (\* Peak corresponding to inseparable known  $\{(\text{Cp}^*\text{W})_2\text{B}_5\text{H}_9\}$ .)

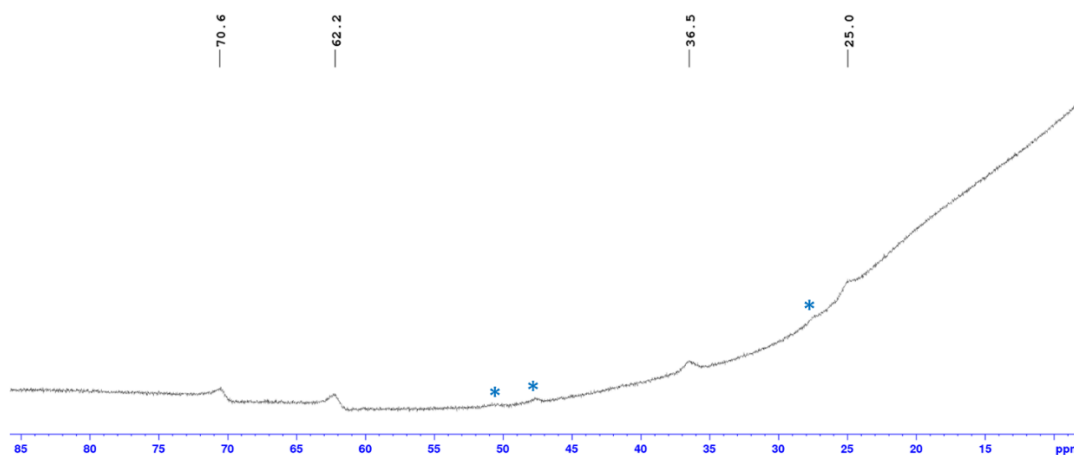

**Figure S2.**  $^{11}\text{B}\{^1\text{H}\}$  NMR spectrum of compound **1** in  $\text{CDCl}_3$ . (\* Peaks corresponding to inseparable known  $\{(\text{Cp}^*\text{W})_2\text{B}_5\text{H}_9\}$ .)

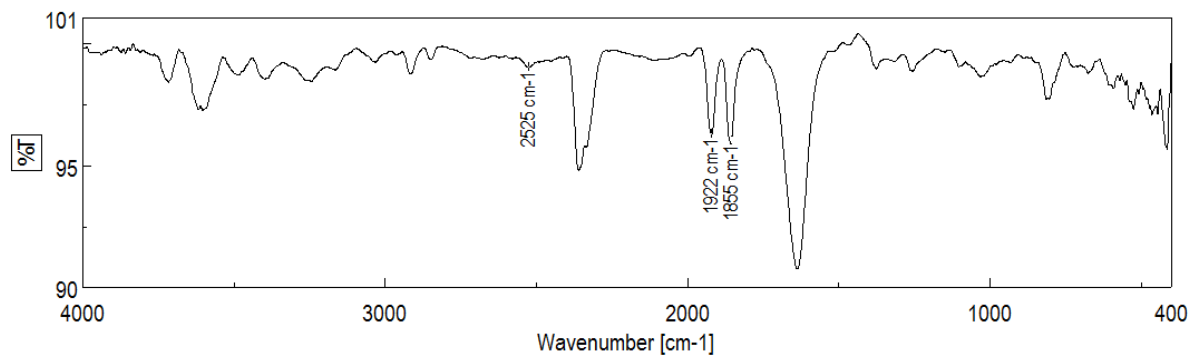

**Figure S3.** IR spectrum of compound **1**.

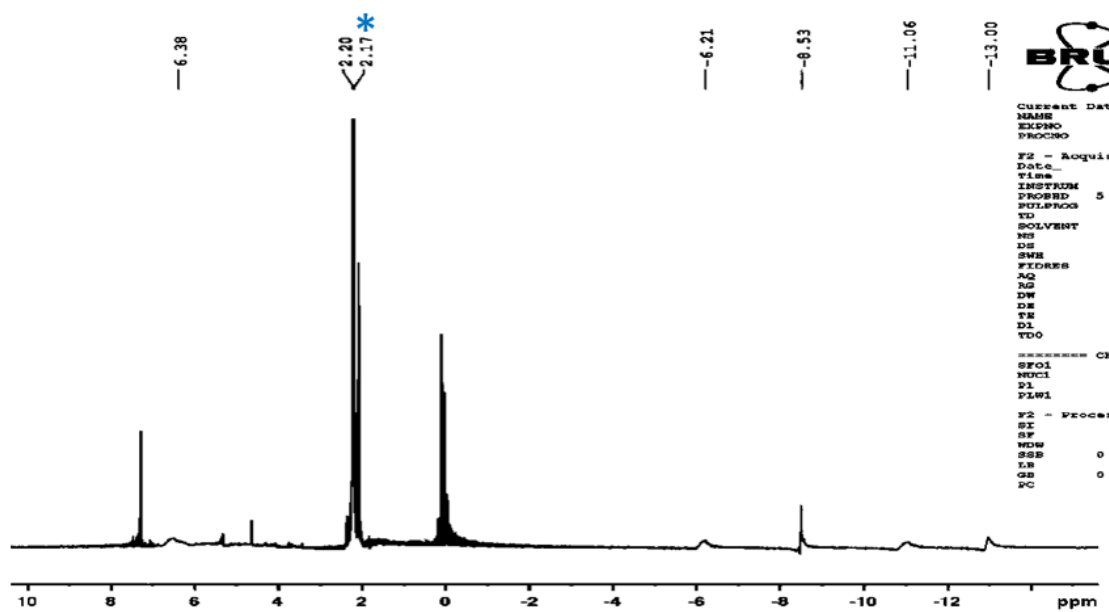

**Figure S4.** <sup>1</sup>H NMR spectrum of compound **2** in CDCl<sub>3</sub>. (\* δ= 2.17 corresponding to Acetone)

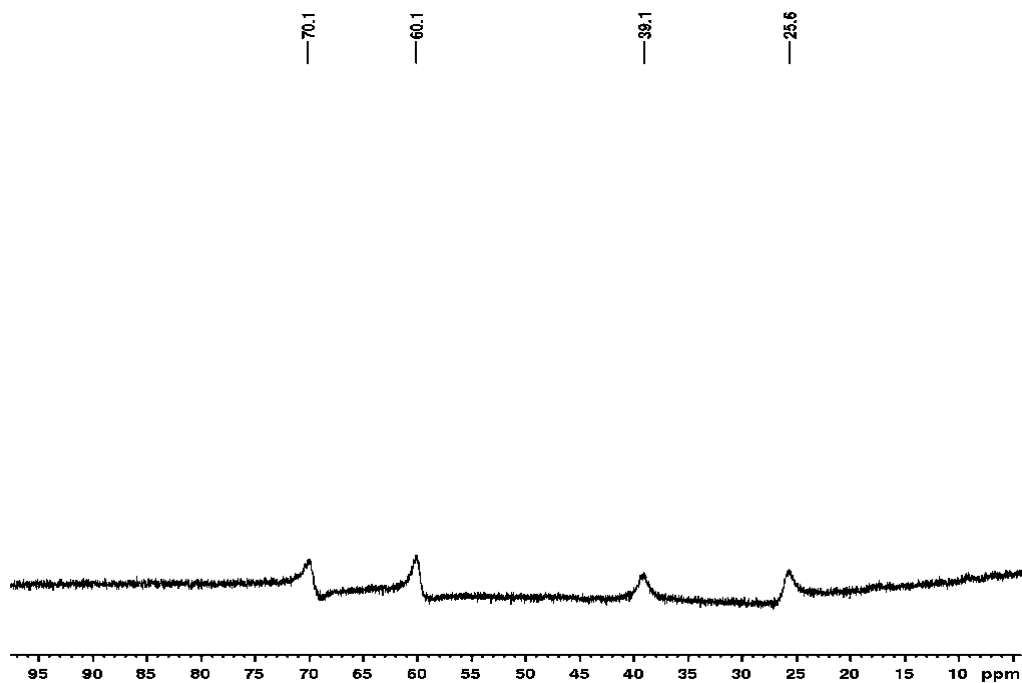

**Figure S5.**  $^{11}\text{B}\{^1\text{H}\}$  NMR spectrum of compound **2** in  $\text{CDCl}_3$ .

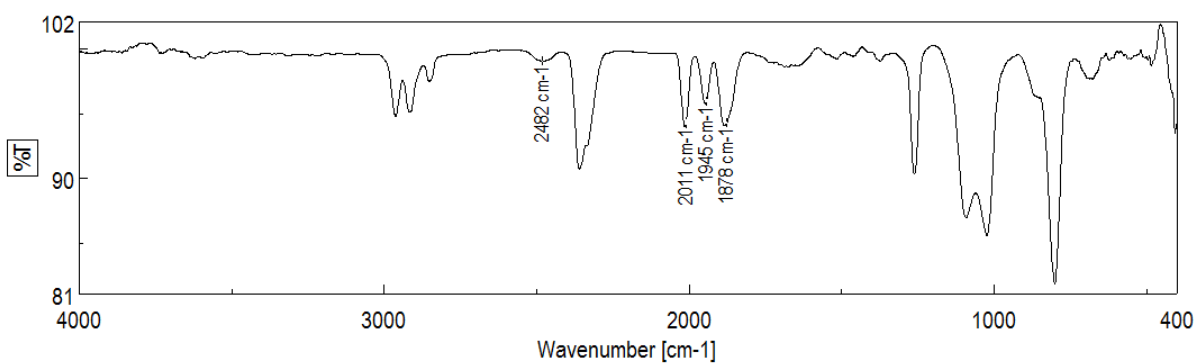

**Figure S6.** IR spectrum of compound **2**.

## Elemental Composition Report

Page 1

## Single Mass Analysis

Tolerance = 5.0 mDa / DBE: min = -1.5, max = 50.0

Element prediction: Off

Number of isotope peaks used for i-FIT = 3

Monoisotopic Mass, Odd and Even Electron Ions

296 formula(e) evaluated with 1 results within limits (up to 50 best isotopic matches for each mass)

Elements Used:

C: 0-24 H: 0-38 B: 0-4 O: 0-4 K: 0-1 Mo: 0-1 W: 0-2

SGG-W2MO

20082018-11-SGG-W2MO 20 (0.503) AM (Cen,5, 80.00, Ar,5000.0,0.00,1.00); Sb (1,40.00); Sm (Mn, 1x5.00); Cm (14.28)

TOF MS ES+

5.04e+003

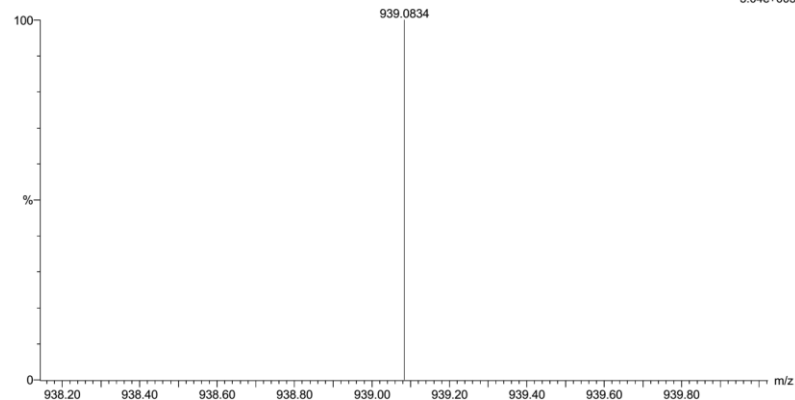

| Minimum: |            |      |      | -1.5 |       |                       |
|----------|------------|------|------|------|-------|-----------------------|
| Maximum: |            | 5.0  | 10.0 | 50.0 |       |                       |
| Mass     | Calc. Mass | mDa  | PPM  | DBE  | i-FIT | Formula               |
| 939.0834 | 939.0853   | -1.9 | -2.0 | 10.5 | n/a   | C24 H38 B4 O4 K Mo W2 |

Figure S7. HR-MS spectrum of compound 2.

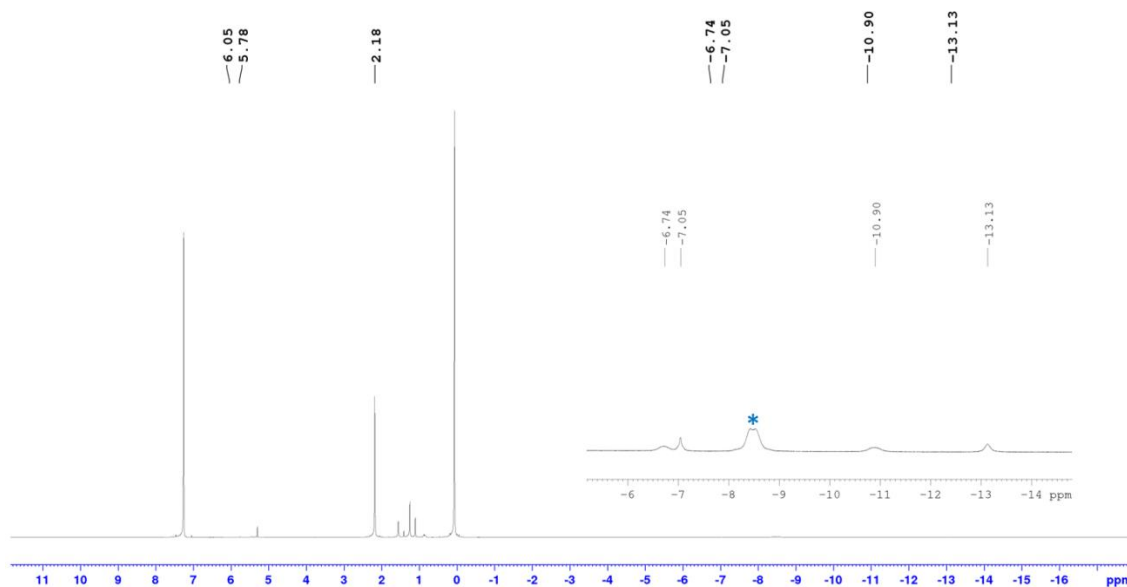

Figure S8. <sup>1</sup>H NMR spectrum of compound 3 in CDCl<sub>3</sub>. (\* Peak corresponding to inseparable known {(Cp\*W)<sub>2</sub>B<sub>5</sub>H<sub>9</sub>}

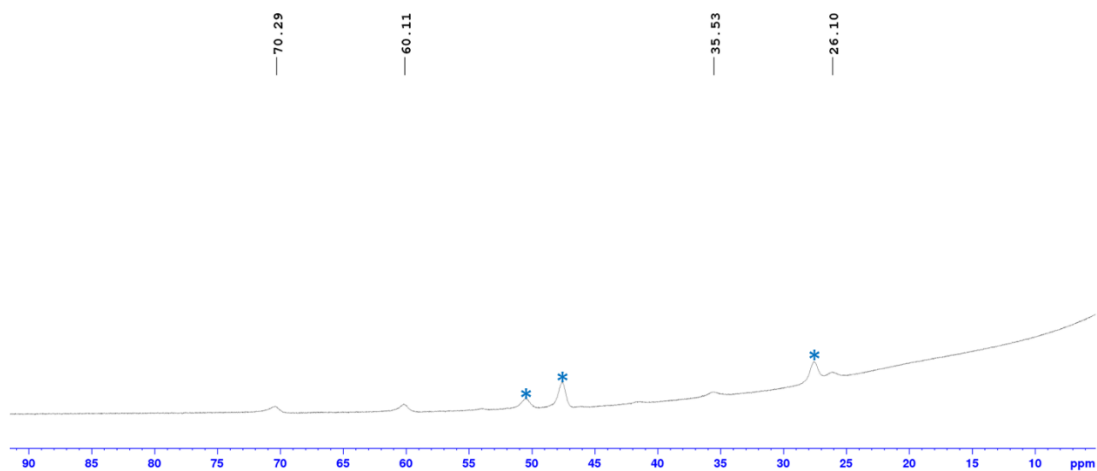

**Figure S9.** <sup>11</sup>B{<sup>1</sup>H} NMR spectrum of compound **3** in CDCl<sub>3</sub>. (\* Peaks corresponding to inseparable known {(Cp\*W)<sub>2</sub>B<sub>5</sub>H<sub>9</sub>})

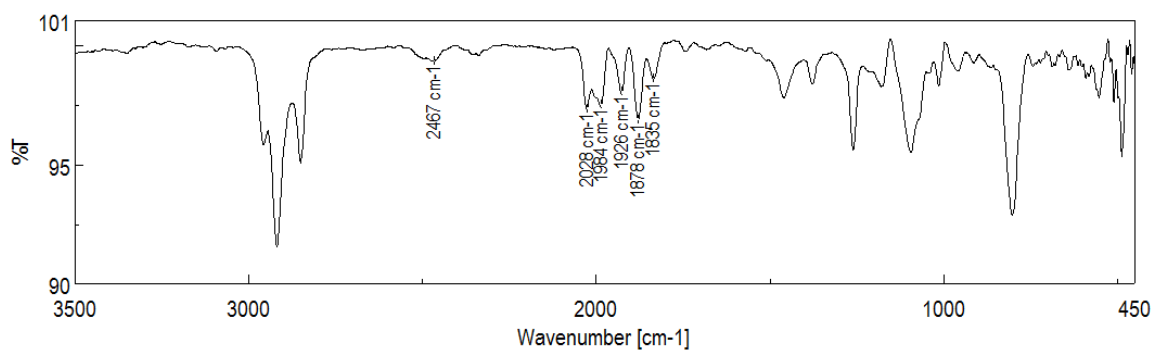

**Figure S10.** IR spectrum of compound **3**.

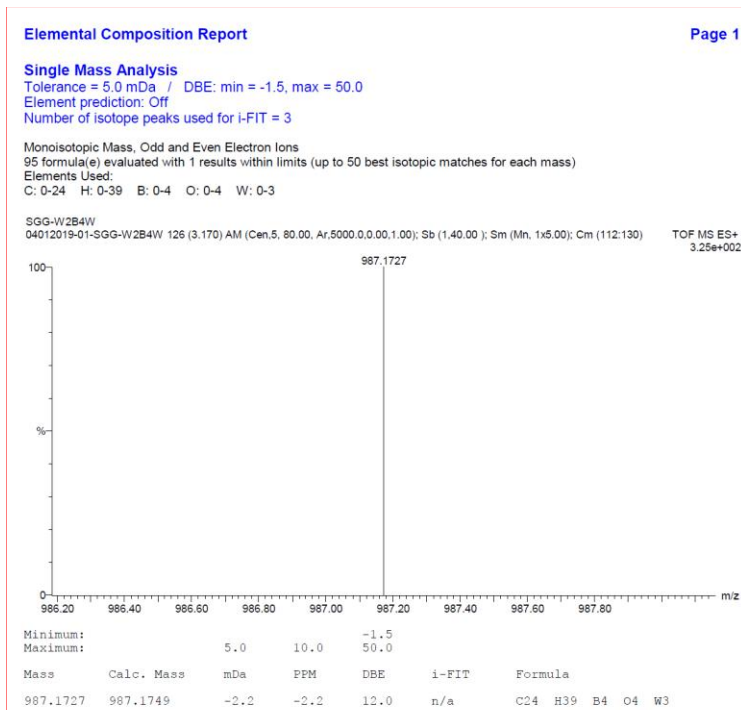

**Figure S11.** HR-MS spectrum of compound **3**.

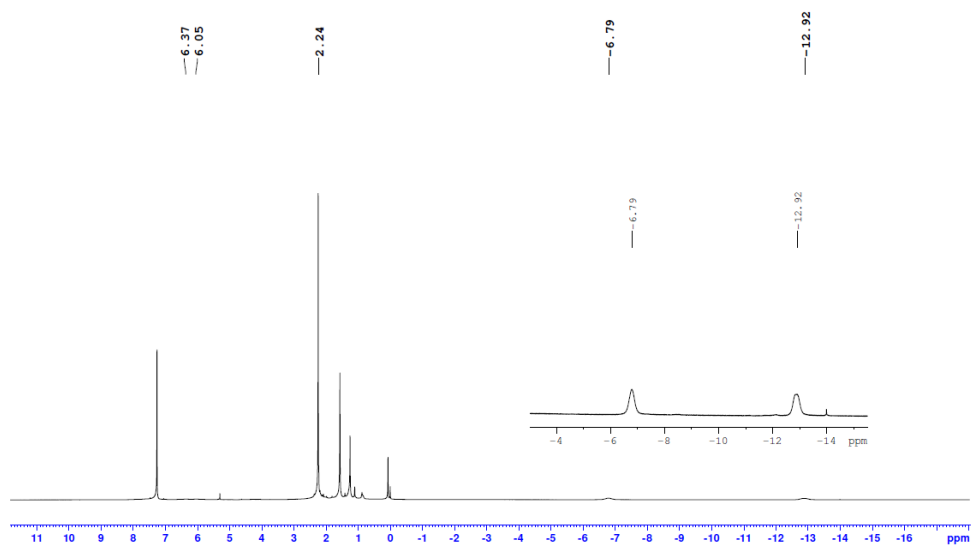

**Figure S12.**  $^1\text{H}$  NMR spectrum of compound **4** in  $\text{CDCl}_3$ .



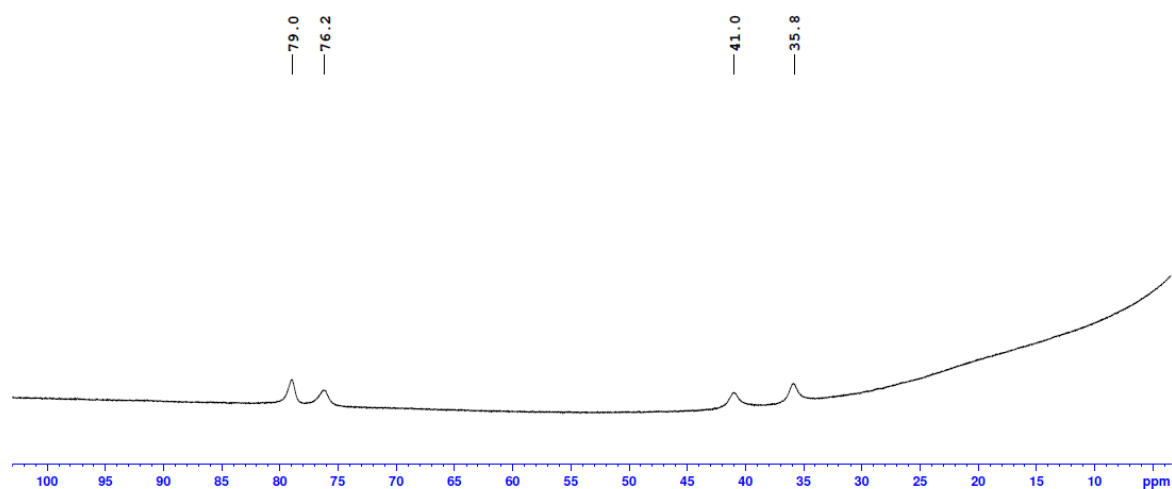

**Figure S13.**  $^{11}\text{B}\{^1\text{H}\}$  NMR spectrum of compound 4 in  $\text{CDCl}_3$ .

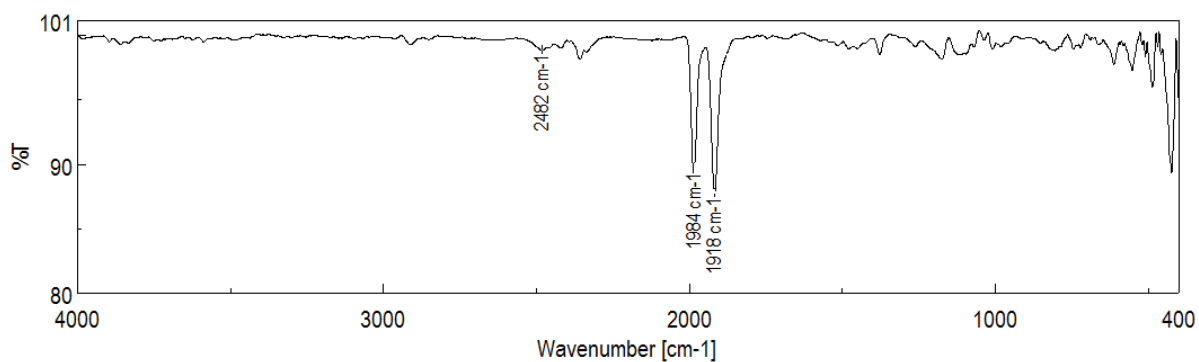

**Figure S14.** IR spectrum of compound 4.

## Elemental Composition Report

Page 1

## Single Mass Analysis

Tolerance = 5.0 mDa / DBE: min = -1.5, max = 50.0

Element prediction: Off

Number of isotope peaks used for i-FIT = 3

Monoisotopic Mass, Odd and Even Electron Ions

2022 formula(e) evaluated with 1 results within limits (up to 50 best isotopic matches for each mass)

Elements Used:

C: 0-23 H: 0-38 B: 0-4 O: 0-3 Na: 0-1 Fe: 0-1 W: 0-2

SGG-W2B4FE

04012019-03-SGG-W2B4FE 19 (0.479) AM (Cen.5, 80.00, Ar,5000.0,0.00,1.00); Sb (1.40.00); Sm (Mn, 1x5.00); Cm (8:19)

TOF MS ES+

6.92e+003

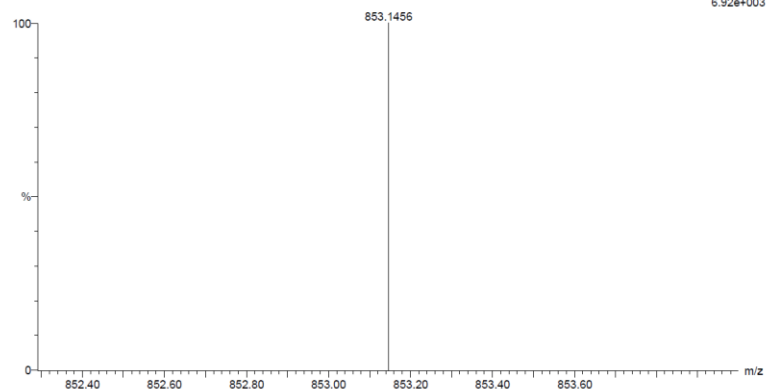

| Minimum: | 5.0        | 10.0 | -1.5 |     |       |                        |
|----------|------------|------|------|-----|-------|------------------------|
| Maximum: |            |      | 50.0 |     |       |                        |
| Mass     | Calc. Mass | mDa  | PPM  | DBE | i-FIT | Formula                |
| 853.1456 | 853.1459   | -0.3 | -0.4 | 9.5 | n/a   | C23 H38 B4 O3 Na Fe W2 |

Figure S15. HR-MS spectrum of compound 4.

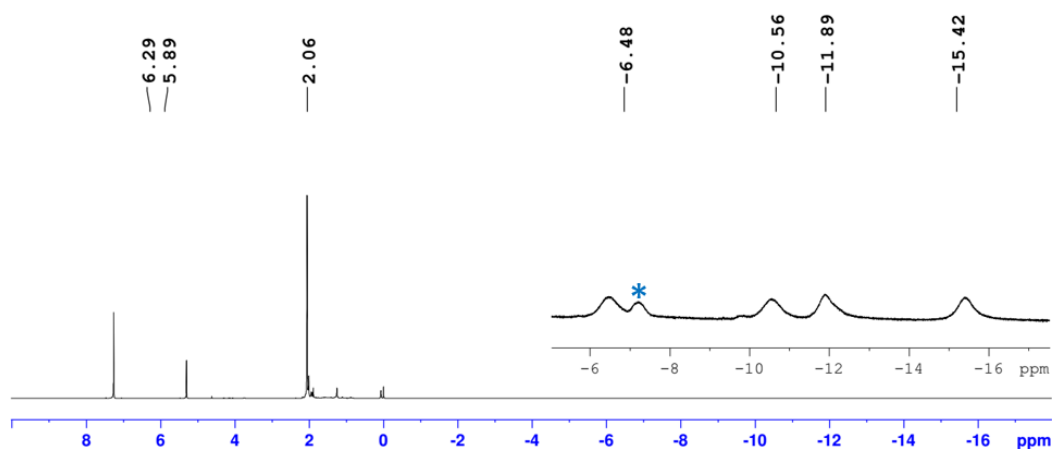

Figure S16. <sup>1</sup>H NMR spectrum of compound 5 in CDCl<sub>3</sub>. (\* Peak corresponding to inseparable known {(Cp\*Mo)<sub>2</sub>B<sub>5</sub>H<sub>9</sub>}.)

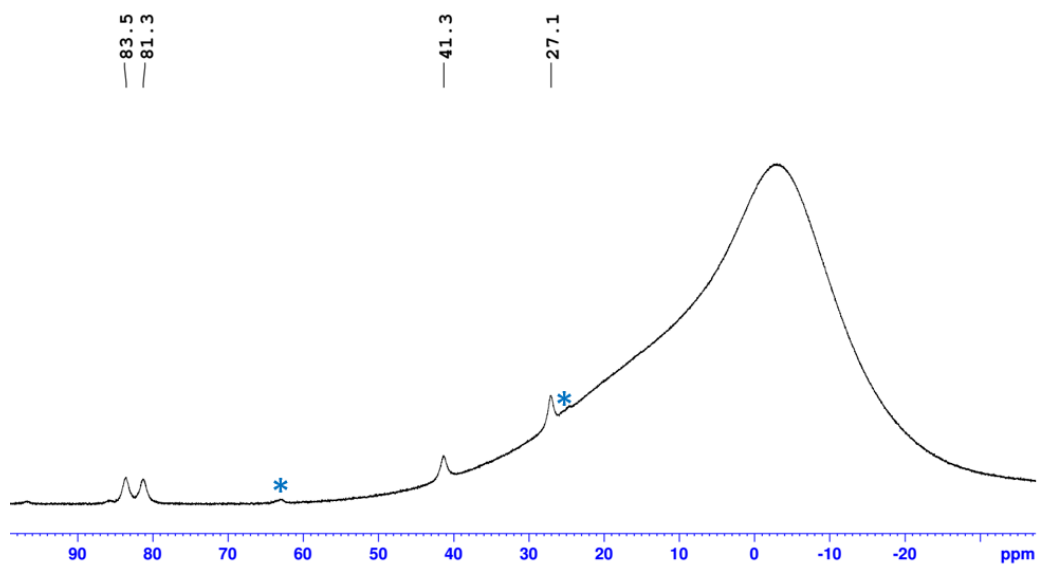

**Figure S17.**  $^{11}\text{B}\{^1\text{H}\}$  spectrum of compound **5** in  $\text{CDCl}_3$ . (\* Peaks corresponding to inseparable known  $\{(\text{Cp}^*\text{Mo})_2\text{B}_5\text{H}_9\}$ ).

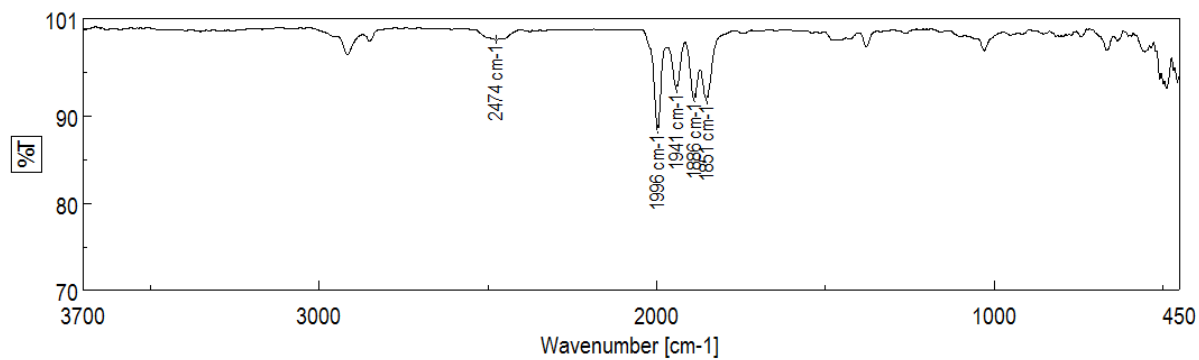

**Figure S18.** IR spectrum of compound **5**.

## Elemental Composition Report

Page 1

## Single Mass Analysis

Tolerance = 5.0 mDa / DBE: min = -1.5, max = 50.0

Element prediction: Off

Number of isotope peaks used for i-FIT = 3

Monoisotopic Mass, Odd and Even Electron Ions

296 formula(e) evaluated with 1 results within limits (up to 50 best isotopic matches for each mass)

Elements Used:

C: 0-24 H: 0-38 B: 0-4 O: 0-4 Na: 0-1 Cr: 0-1 Mo: 0-2

SGG-MO2B4CR

04012019-02-SGG-MO2B4CR 56 (1.409) AM (Cen,5, 80.00, Ar,5000.0,0.00,1.00); Sb (1.40.00); Sm (Mn, 1x5.00); Cm (46.71)

TOF MS ES+  
6.27e+002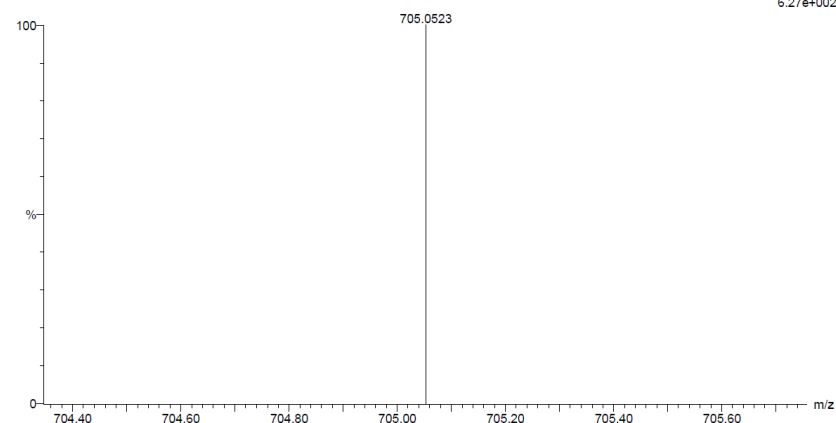

| Minimum: |            |      |      | -1.5 |       |                         |
|----------|------------|------|------|------|-------|-------------------------|
| Maximum: |            | 5.0  | 10.0 | 50.0 |       |                         |
| Mass     | Calc. Mass | mDa  | PPM  | DBE  | i-FIT | Formula                 |
| 705.0523 | 705.0553   | -3.0 | -4.3 | 7.5  | n/a   | C24 H38 B4 O4 Na Cr Mo2 |

Figure S19. HR-MS spectrum of compound 5.
